# Supplementary material
Source: PubMed Central journal article supplement (PMC2151677)
Supplement: plntphys_pp.107.110262_1.pdf [file plntphys_pp.107.110262_1.pdf]

Fig. 10

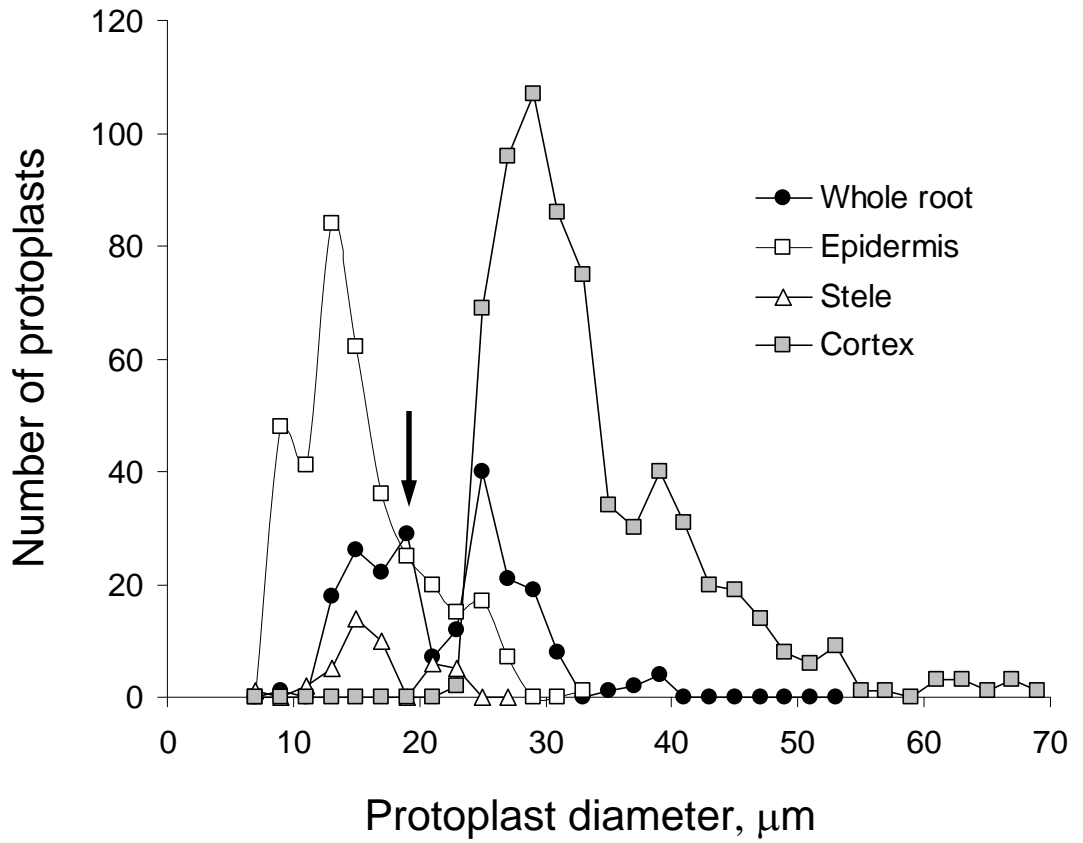

**Supplementary Fig. 1.** Protoplast size distributions for the whole root and the three tissue types isolated. Arrow shows the protoplast size chosen for patch experiments.
