# Supplementary material
Source: PubMed Central journal article supplement (PMC2151677)
Supplement: plntphys_pp.107.110262_2.pdf [file plntphys_pp.107.110262_2.pdf]

**Supplementary Table 1.** Basic characteristics of protoplasts isolated from different parts of the mature region of barley roots.

| Tissue type | Mean diameter,<br>$\mu\text{m}$ | S.D. | Sample size | Number of<br>isolations | Total number<br>of protoplasts |
|-------------|---------------------------------|------|-------------|-------------------------|--------------------------------|
| Entire root | 21.4                            | 6.2  | 212         | 4                       | 1400                           |
| Epidermis   | 14.2                            | 5.1  | 352         | 4                       | 900                            |
| Stele       | 16.7                            | 4.2  | 50          | 4                       | 50                             |
| Cortex      | 33.3                            | 8.2  | 509         | 3                       | 3100                           |
